# Supplementary material for: Genome-Wide Analysis of Human MicroRNA Stability
Source: Hindawi journal article supplement (doi:10.1155/2013/368975), 2013-01-01

# Supplementary Figure S1

A

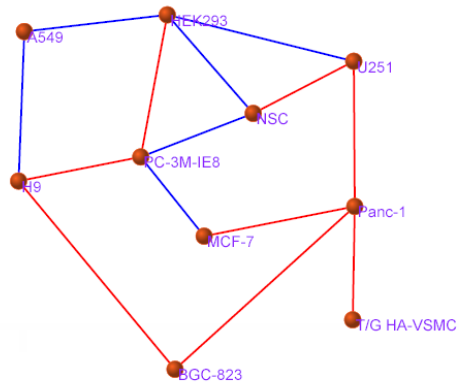

B

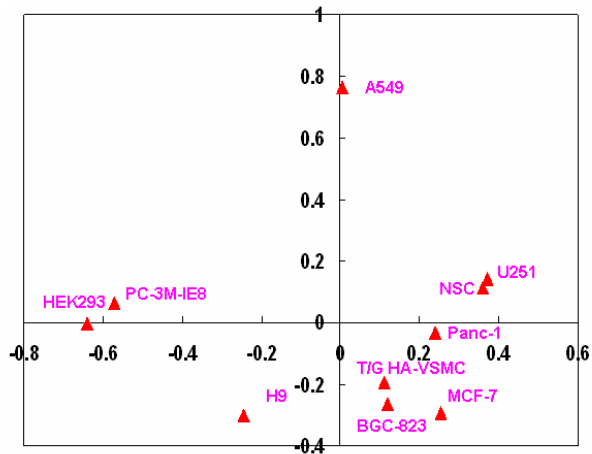

Supplementary Figure S2

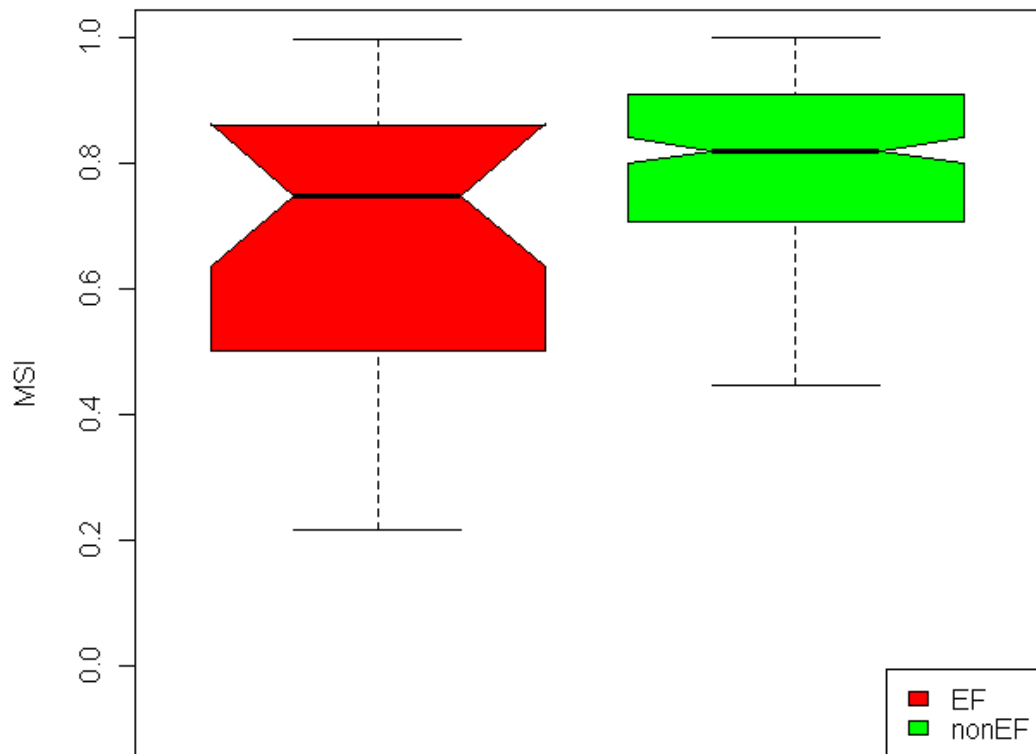

Supplement: f1 [file 368975.f1.pdf]
